# Supplementary material for: Field Use of Protective Bacteriophages against Pectinolytic Bacteria of Potato
Source: MDPI journal article supplement (doi:10.3390/microorganisms11030620), 2023-02-28
Supplement: s1 [file s1]

**Supplementary Figure S1.** Growth curves of bacteriophages  $\phi$ Ds3CZ and  $\phi$ Ds20CZ.

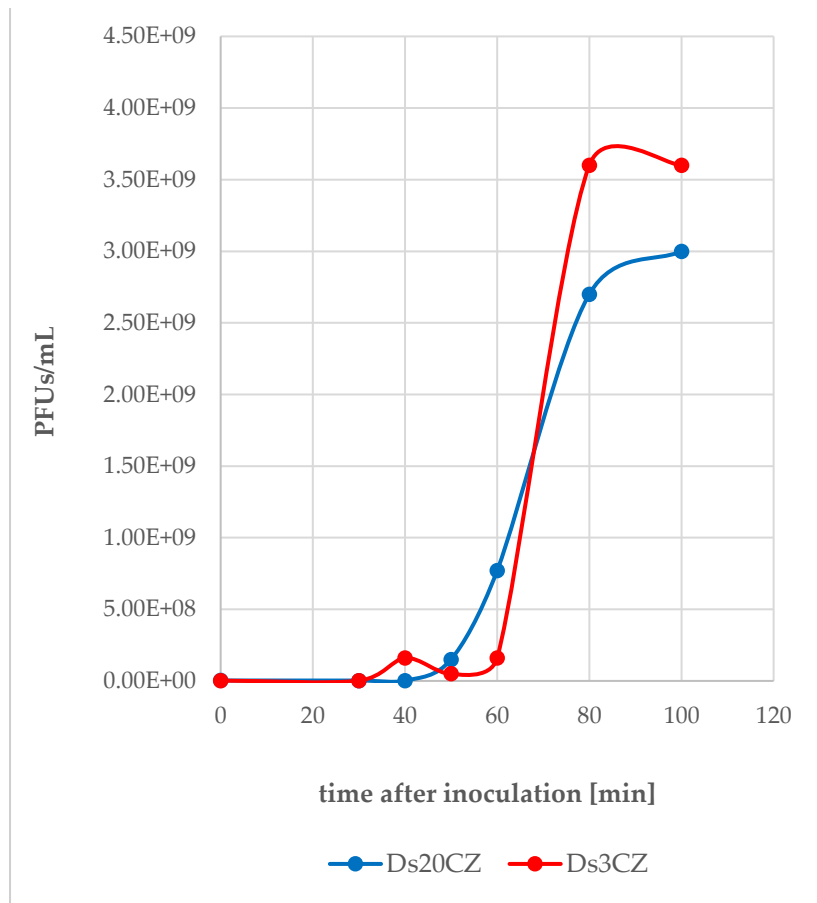

**Supplementary Figure S2.** Recombination analysis of Czech bacteriophage Ds25CZ (MN813053) genome. A) schematic representation of similarities between the Ds25CZ (MN813053) and the Coodle (MH807820) genomes. Blue boxes mark recombination events signaled by both RDP5 and alignment similarities; orange boxes mark highly different regions inferred from alignment only. B) Similarity values of individual parts of the Ds25CZ genome relative to all other limestoneviruses. The highest values indicating minor parents are boxed.

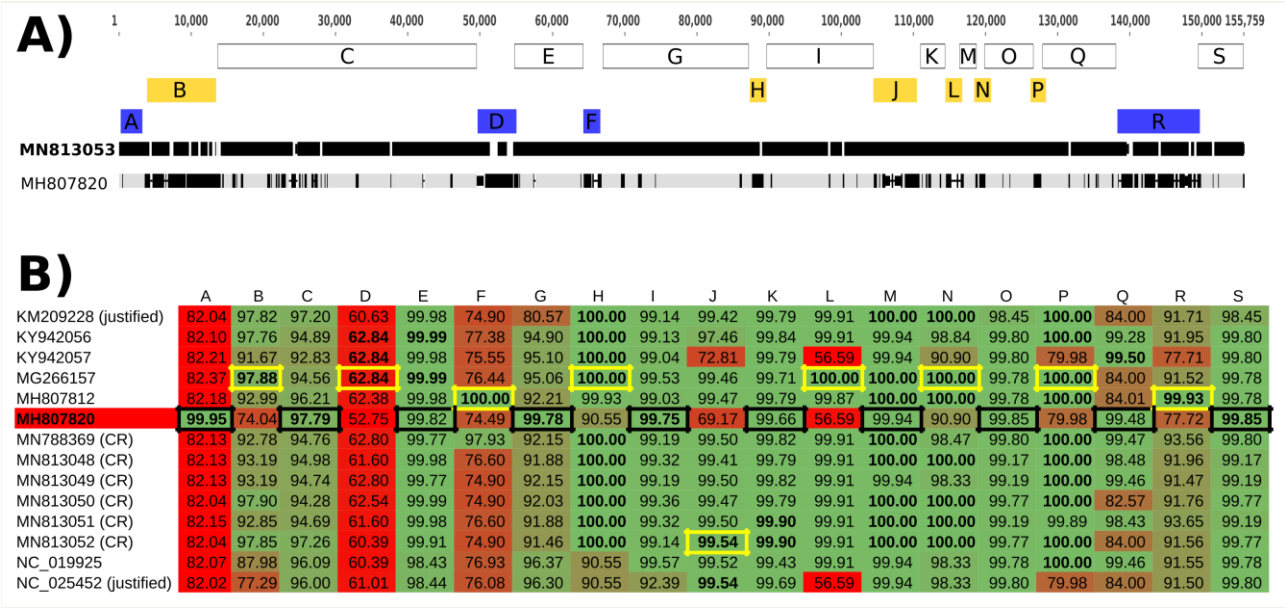

**Supplementary Figure S3.** Curative effect of  $\phi$ Ds3CZ and  $\phi$ Ds20CZ solution in relation to concentration observed on tuber slices. Phage treatment at concentrations of  $1 \times 10^6$ ,  $1 \times 10^7$ , and  $1 \times 10^8$  PFUs/mL, negative control (water), and positive control (bacterial inoculation only). Positive control is essentially 100% macerated.

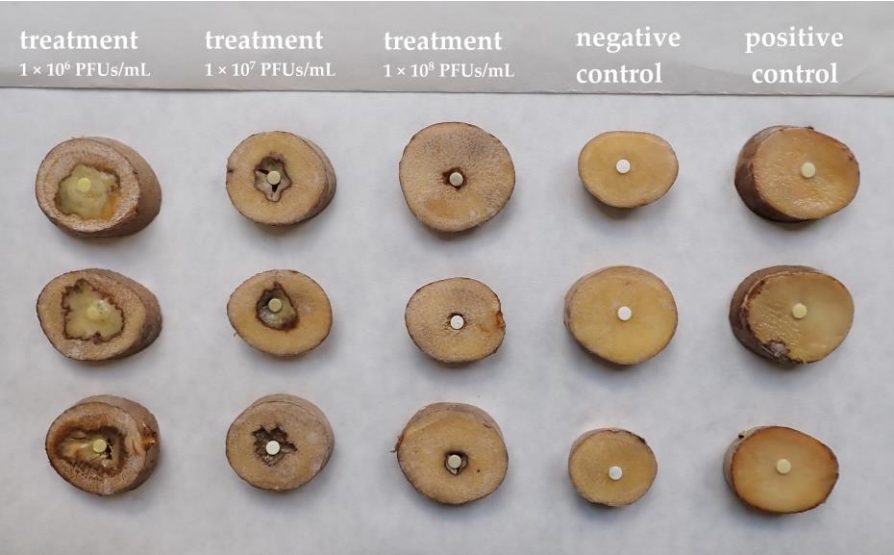

**Supplementary Table S1.** *Dickeya limestoneviruses* used for the recombination analysis

| <b>Isolate</b> | <b>AC number</b> | <b>nt</b> | <b>Country</b> |
|----------------|------------------|-----------|----------------|
| Coodle         | MH807820         | 152515    | Denmark        |
| Ds16CZ         | MN813050         | 152837    | Czech Republic |
| Ds20CZ         | MN813051         | 154720    | Czech Republic |
| Ds23CZ         | MN813052         | 149364    | Czech Republic |
| Ds25CZ         | MN813053         | 151710    | Czech Republic |
| Ds3CZ          | MN788369         | 155285    | Czech Republic |
| Ds5CZ          | MN813048         | 154722    | Czech Republic |
| Ds9CZ          | MN813049         | 154716    | Czech Republic |
| JA15           | KY942056         | 153757    | United Kingdom |
| Kamild         | MH807812         | 152612    | Denmark        |
| Limestone      | NC_019925        | 152427    | Belgium        |
| phiD3          | KM209228         | 152308    | Poland         |
| PP35           | MG266157         | 152048    | Russia         |
| RC-2014        | NC_025452        | 155346    | Poland         |
| XF4            | KY942057         | 151519    | United Kingdom |
